# Supplementary material for: Probing the effect of nitro-substituents in the modulation of LUMO energies for directional electron transport through 4d6ruthenium(ii)-based metallosurfactants
Source: Royal Society of Chemistry journal article supplement (doi:10.1039/d3dt01797d), 2023-01-01

## Probing the Effect of Nitro-substituents in the Modulation of LUMO Energies for Directional Electron Transport through 4d<sup>6</sup> Ruthenium(II)-based Metallosurfactants

Samudra Amunugama,<sup>a</sup> Eyram Asempa,<sup>b</sup> Elena Jakubikova,<sup>\*,b</sup> Cláudio N. Verani<sup>\*,a</sup>

(a) Department of Chemistry, Wayne State University, Detroit, MI 48202, USA.

(b) Department of Chemistry, North Carolina State University, Raleigh, NC 27695, USA

### Outline

**Figure S1.** ESI mass spectrum of complex **1-3** (a-c)

**Figure S2.** <sup>1</sup>H-NMR spectrum of 4'-(4-(octadecyloxy)phenyl)-2,2':6'2''-terpyridine (L<sup>terpy</sup>) ligand

**Figure S3.** <sup>1</sup>H-NMR spectrum of 4'-(4-nitrophenyl)-2,2':6',2''-terpyridine (tpy<sup>NO2</sup>)

**Figure S4.** COSY NMR spectrum of complex [Ru(tpy<sup>OC18</sup>)(tpy)](PF<sub>6</sub>)<sub>2</sub> **1**

**Figure S5.** HSQC NMR spectrum of complex [Ru(tpy<sup>OC18</sup>)(tpy)](PF<sub>6</sub>)<sub>2</sub> **1**

**Figure S6.** COSY NMR spectrum of complex [Ru(tpy<sup>OC18</sup>)(phen)Cl](PF<sub>6</sub>) **3**

**Figure S7.** HSQC NMR spectrum of complex [Ru(tpy<sup>OC18</sup>)(phen)Cl](PF<sub>6</sub>) **3**

**Figure S8.** HSQC NMR spectrum of complex [Ru(tpy<sup>OC18</sup>)(phen<sup>NO2</sup>)Cl](PF<sub>6</sub>) **4**

**Figure S9.** UV-visible spectrum of complexes **1-4** in 1 x 10<sup>-5</sup> M dichloromethane solution

**Table T1.** UV-visible data for complexes **1-4**

**Table T2.** Redox potentials vs Fc/Fc<sup>+</sup> for complexes **1-4**

**Figure S10.** Isothermal compression data of complexes **1-4** (a-d)

**Figure S11.** BAM Images of Complexes **1, 2** and **3**

**Table T3.** Transfer ratios of monolayers of complexes **1-4**

**Figure S12.** Comparison of UV-vis spectrum of LB films and solution state UV-vis spectrum of **3**

**Figure S13.** Comparison of UV-vis spectrum of LB films and solution state UV-vis spectrum of **4**

**Figure S14.** Comparison between IR spectrum of complex **4** in KBr and IRRAS spectrum of 47-layer LB film.

**Figure S15.** Comparison between IR spectrum of complex **3** in KBr and IRRAS spectrum of 47-layer LB film.

**Figure S16.** Mass spectrum of [Ru(tpy<sup>OC18</sup>)(phen)Cl](PF<sub>6</sub>) **3** recovered from LB films

**Figure S17.** Mass spectrum of [Ru(tpy<sup>OC18</sup>)(phen<sup>NO2</sup>)Cl](PF<sub>6</sub>) **4** recovered from LB films

**Figure S18.** AFM images of complex **4** deposited at 17, 20, 24, and 28 mN/m

**Table T4.** Summary of surface roughness data of LB monolayers of complex **3** and **4** deposited at different pressures

**Figure S19.** Asymmetric ruthenium(II) complexes investigated in the theoretical section (the -C<sub>18</sub>H<sub>37</sub> group was replaced by a -CH<sub>3</sub> group)

**Figure S20.** (a) Fragment orbital analysis of the singlet state of **1-3** (a-c) in dichloromethane

**Figure S21.** Ground state (singlet) frontier molecular orbitals of **1-3** complexes

**Figure S22.** Molecular orbital diagram of asymmetric Ru complexes in their singlet ground state. MO colors correspond to their character; blue - metal-based, green - MeO-terpyridine-based,

purple - mixed character with contributions from Ru metal and MeO-terpyridine, brown - substituted terpyridine based, black – mixed character with contributions from MeO-terpyridine and substituted terpyridine, red - phenanthroline based)

**Figure S23.** Natural orbitals (for open shell species) and molecular orbitals (for closed shell species) of the oxidized and reduced species of an asymmetric Ru complex **1** in dichloromethane. Orbital occupancy is shown for each orbital (0.0 – unoccupied orbital, 1.0 – singly-occupied orbital, 2.0 – doubly-occupied orbital)

**Figure S24.** Natural orbitals (for open shell species) and molecular orbitals (for closed shell species) of the oxidized and reduced species of an asymmetric Ru complex **2** in dichloromethane. Orbital occupancy is shown for each orbital (0.0 – unoccupied orbital, 1.0 – singly-occupied orbital, 2.0 – doubly-occupied orbital)

**Figure S25.** Natural orbitals (for open shell species) and molecular orbitals (for closed shell species) of the oxidized and reduced species of an asymmetric Ru complex **3** in dichloromethane. Orbital occupancy is shown for each orbital (0.0 – unoccupied orbital, 1.0 – singly-occupied orbital, 2.0 – doubly-occupied orbital)

**Figure S26.** Natural orbitals (for open shell species) and molecular orbitals (for closed shell species) of the oxidized and reduced species of an asymmetric Ru complex **4** in dichloromethane. Orbital occupancy is shown for each orbital (0.0 – unoccupied orbital, 1.0 – singly-occupied orbital, 2.0 – doubly-occupied orbital)

**Table T5:** Electrochemical data for asymmetric Ru(II) complexes in dichloromethane (PCM solvent model), S = singlet, D = doublet and T = triplet

**Figure S27.** I-V characteristics of complex **4** in four devices

**Figure S1:** ESI mass spectrum of complex 1-3 (a-c)

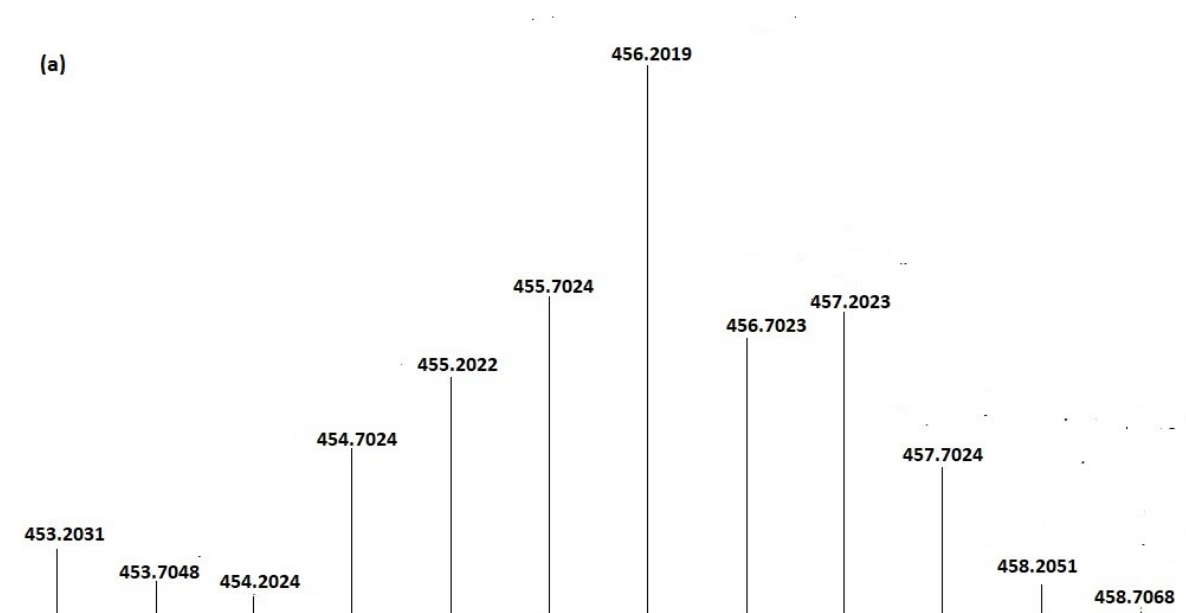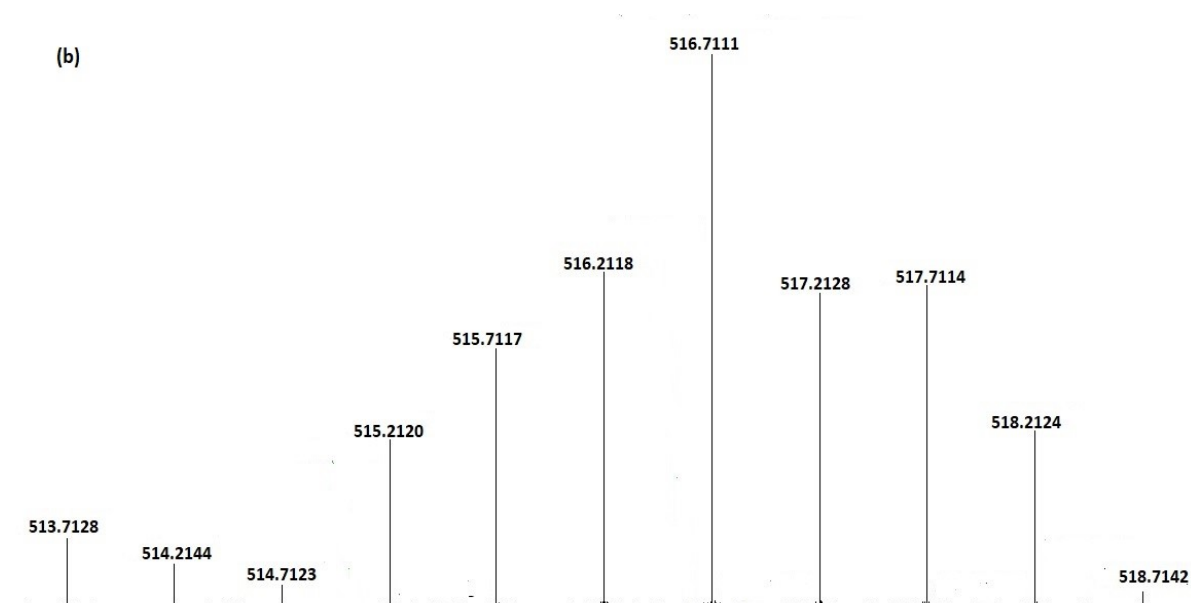

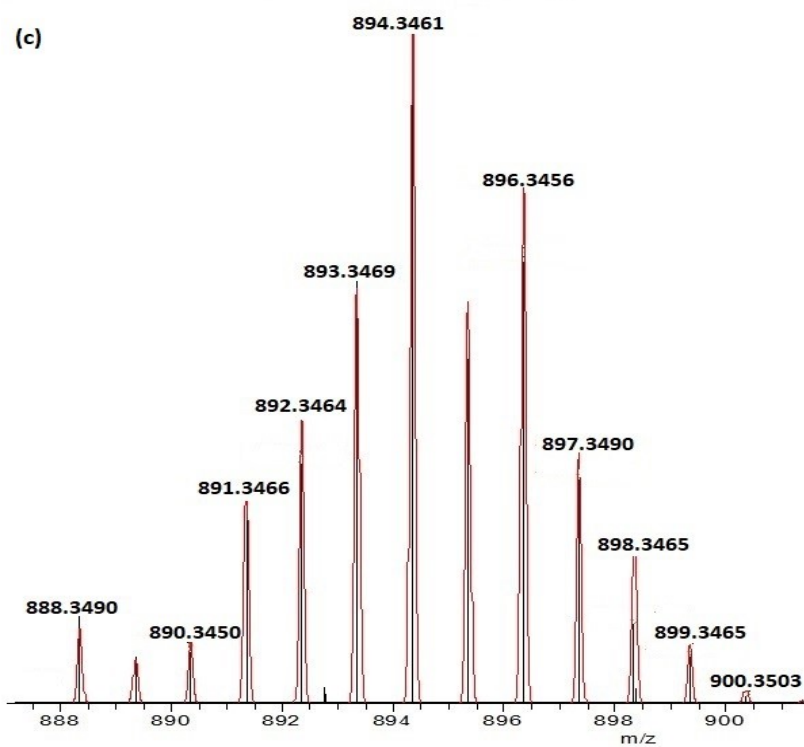

**Figure S2:**  $^1\text{H}$ -NMR spectrum of 4'-(4-(octadecyloxy)phenyl)-2,2':6'2''-terpyridine ( $\text{L}^{\text{terpy}}$ ) ligand

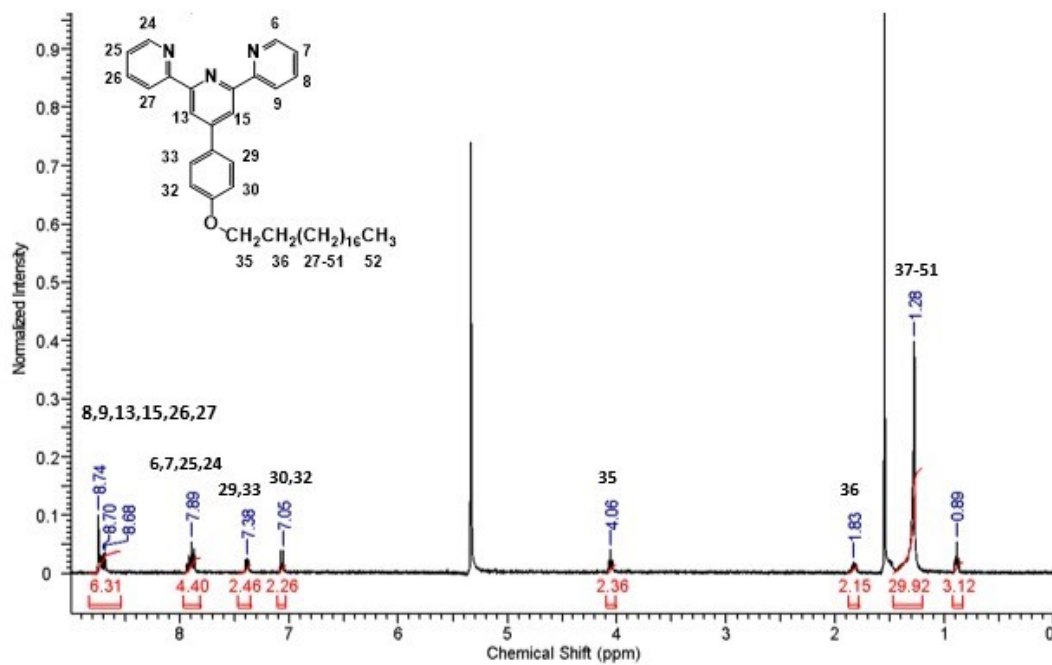

**Figure S3:**  $^1\text{H}$ -NMR spectrum of 4'-(4-nitrophenyl)-2,2':6',2''-terpyridine ( $\text{tpy}^{\text{NO}_2}$ )

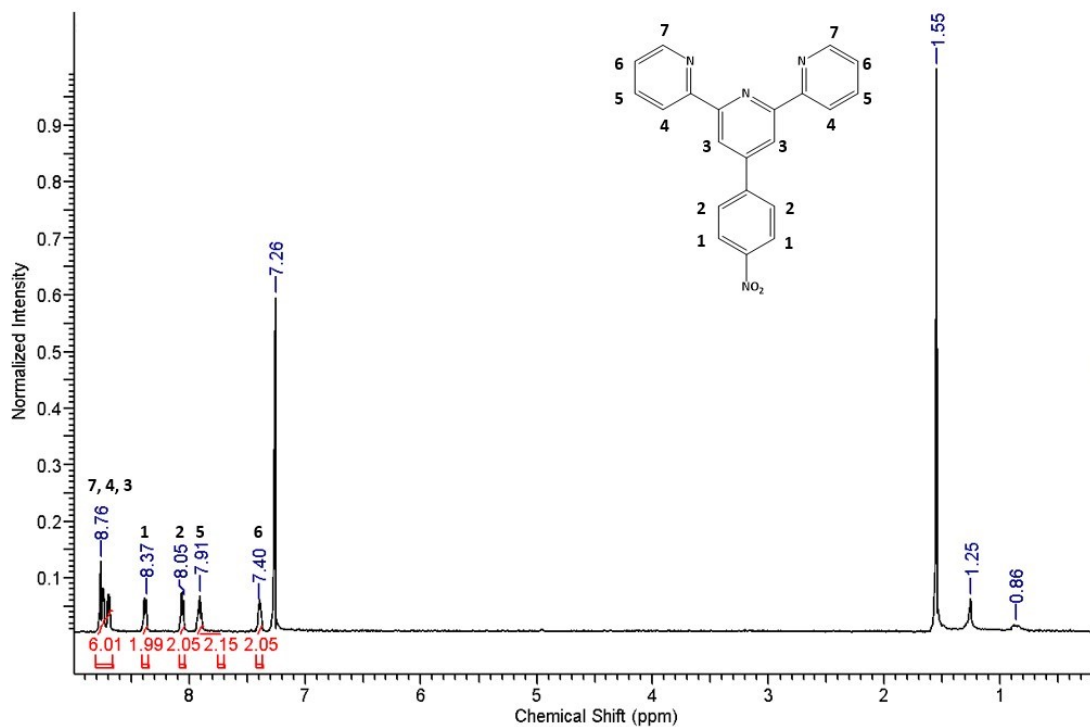

**Figure S4:** COSY NMR spectrum of complex  $[\text{Ru}(\text{tpy}^{\text{OC18}})(\text{tpy})](\text{PF}_6)_2$  **1**

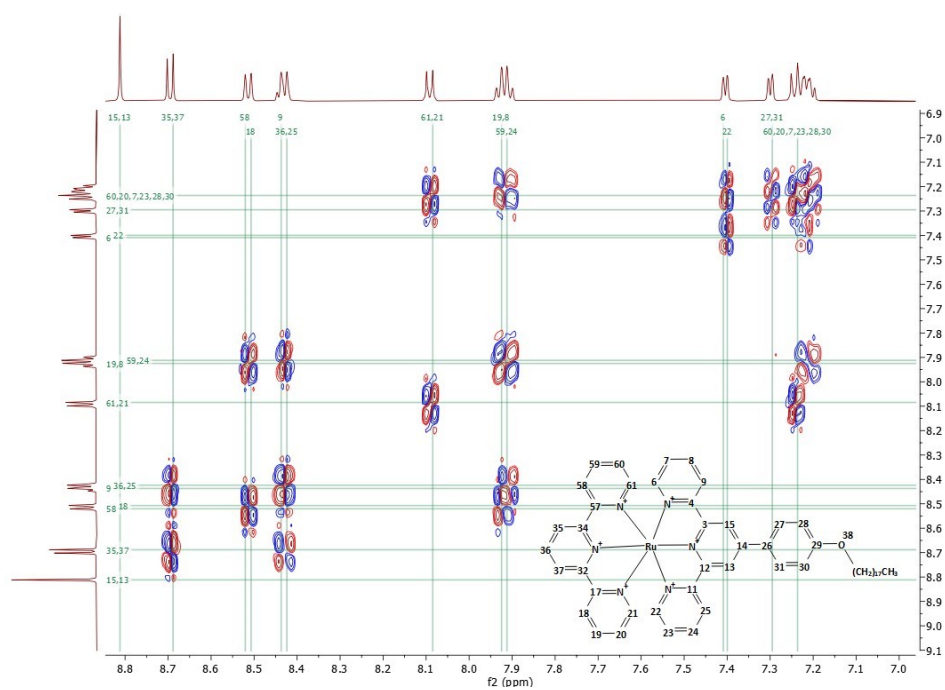

**Figure S5:** HSQC NMR spectrum of complex  $[\text{Ru}(\text{tpy}^{\text{OC18}})(\text{tpy})](\text{PF}_6)_2$  **1**

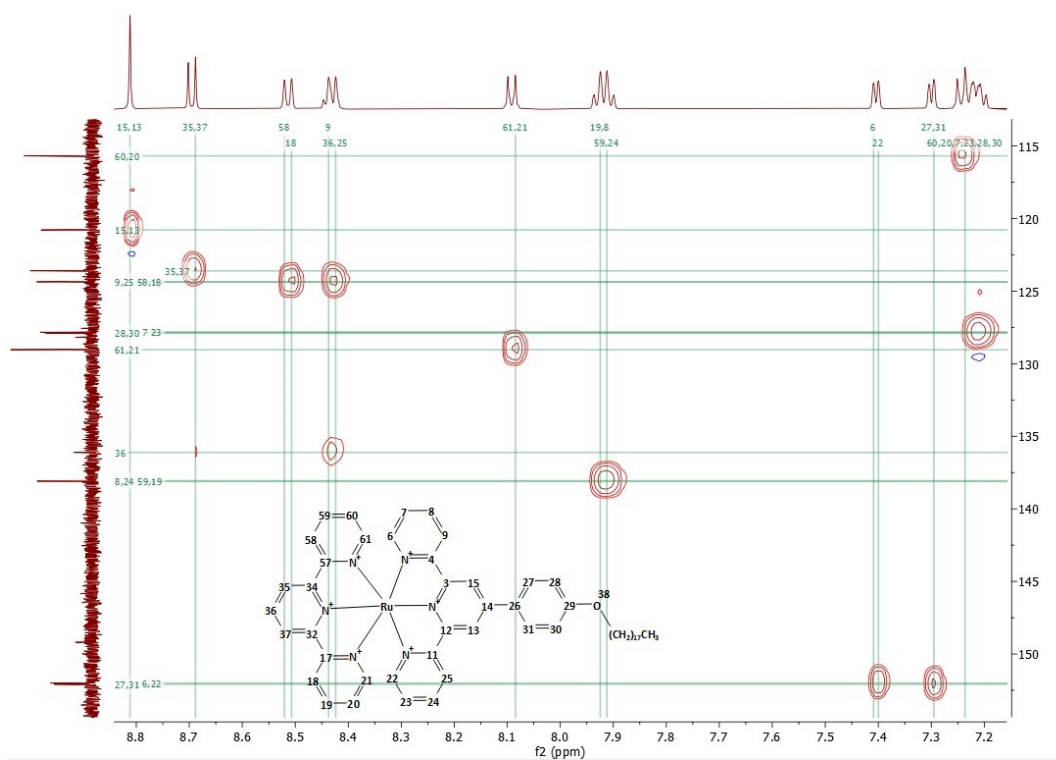

**Figure S6:** COSY NMR spectrum of complex  $[\text{Ru}(\text{tpy}^{\text{OC18}})(\text{phen})\text{Cl}](\text{PF}_6)$  **3**

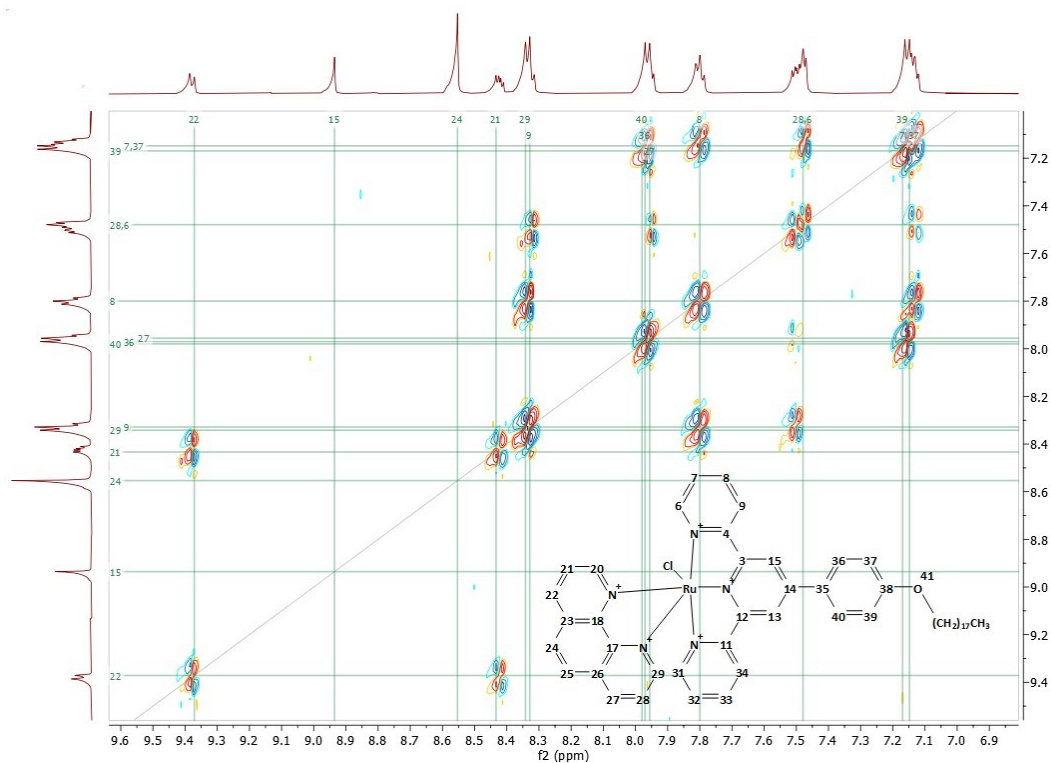

**Figure S7:** HSQC NMR spectrum of complex  $[\text{Ru}(\text{tpy}^{\text{OC18}})(\text{phen})\text{Cl}](\text{PF}_6)$  **3**

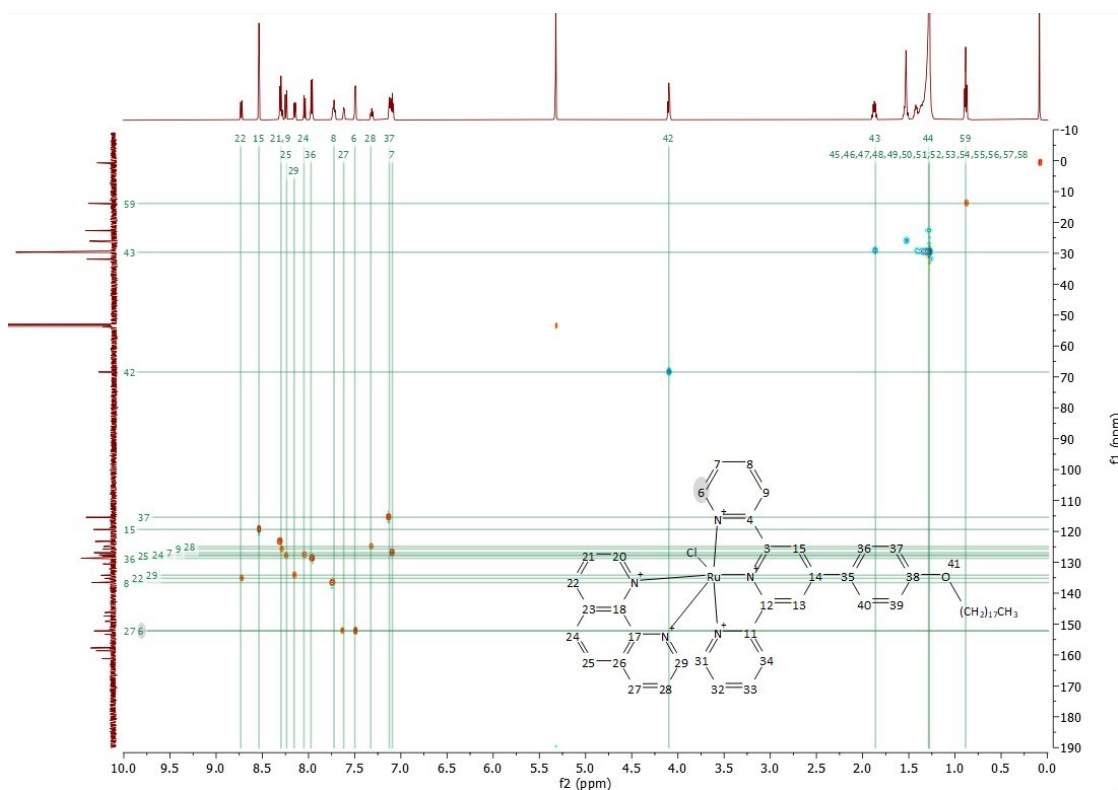

**Figure S8:** HSQC NMR spectrum of complex  $[\text{Ru}(\text{tpy}^{\text{OC18}})(\text{phen}^{\text{NO}_2})\text{Cl}](\text{PF}_6)$  **4**

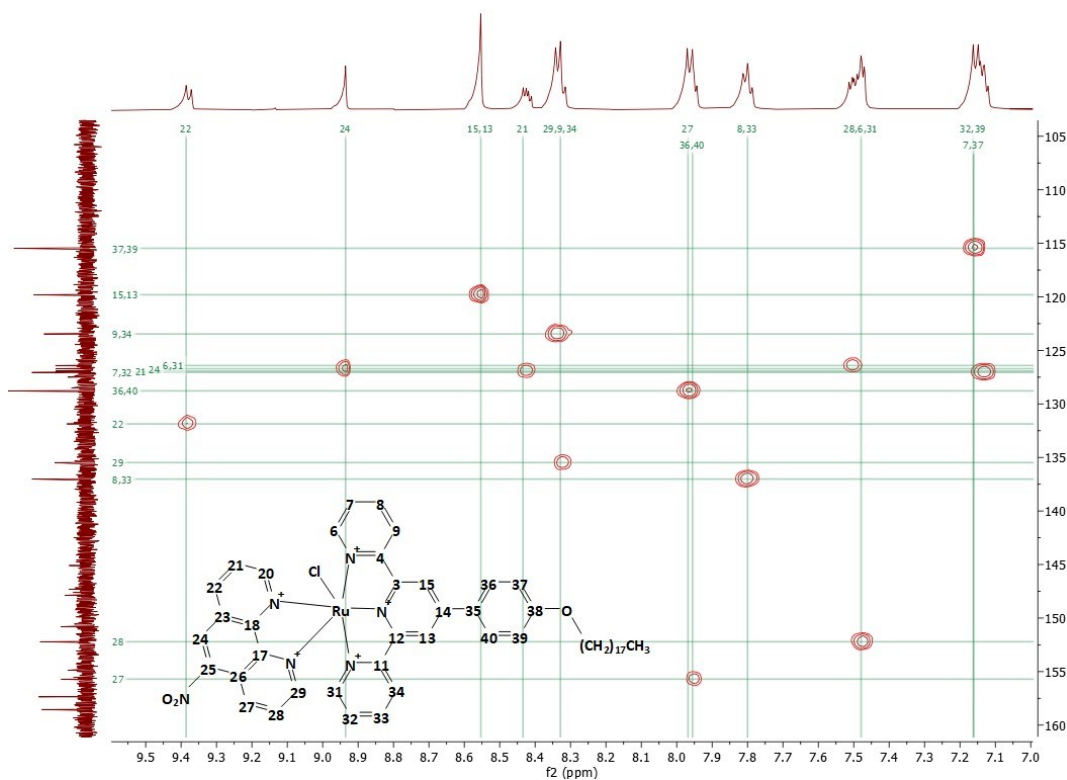

**Figure S9:** UV-visible spectrum of complexes **1-4** in  $1 \times 10^{-5}$  M dichloromethane solution

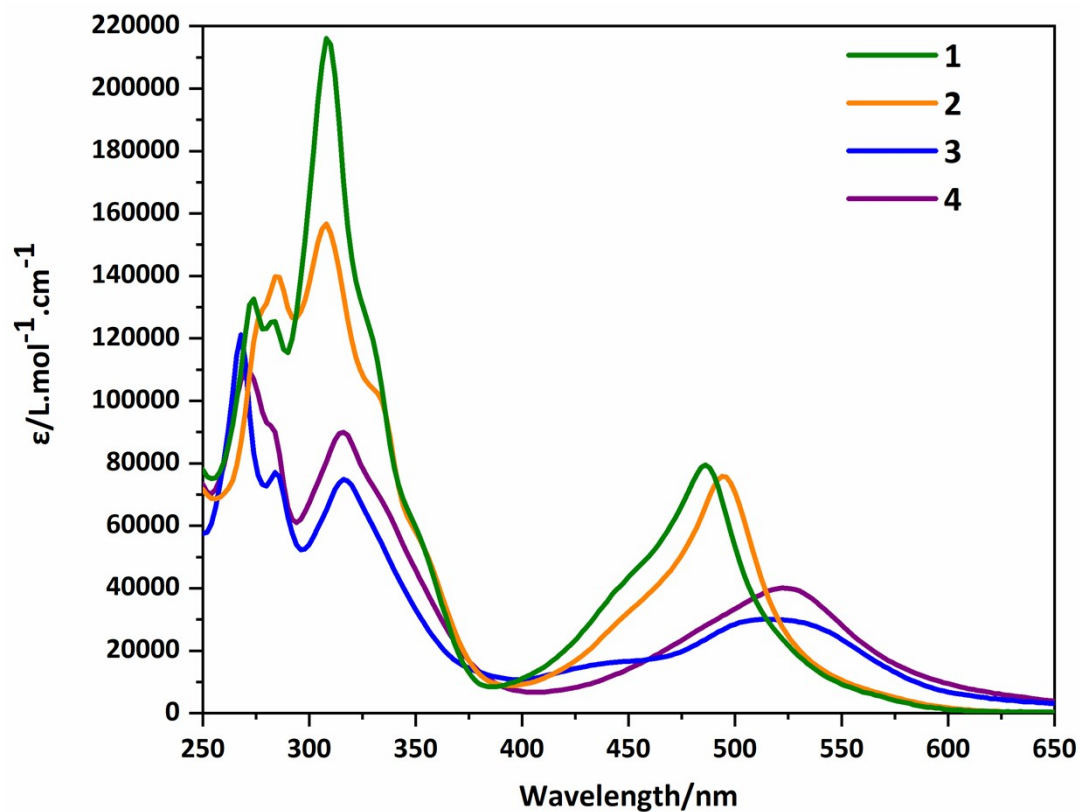

**Table T1:** UV-visible data for complexes **1-4**

| Complex  | $\lambda_{\max}$ , nm ( $\epsilon$ , L. mol <sup>-1</sup> . cm <sup>-1</sup> ) CH <sub>2</sub> Cl <sub>2</sub> |
|----------|----------------------------------------------------------------------------------------------------------------|
| <b>1</b> | 232, 274, 308, 486                                                                                             |
| <b>2</b> | 236, 284, 308, 494                                                                                             |
| <b>3</b> | 232, 268, 316, 514                                                                                             |
| <b>4</b> | 240, 272, 316, 522                                                                                             |

**Table T2:** Redox potentials vs Fc/Fc<sup>+</sup> for complexes **1-4**

| Process vs Fc/Fc <sup>+</sup><br>Compound | E <sub>1/2</sub> (ΔE <sub>p</sub> )/V<br> I <sub>pa</sub> /I <sub>pc</sub> | E <sub>1/2</sub> (ΔE <sub>p</sub> )/V<br> I <sub>pa</sub> /I <sub>pc</sub> | E <sub>1/2</sub> (ΔE <sub>p</sub> )/V<br> I <sub>pa</sub> /I <sub>pc</sub> | E <sub>1/2</sub> (ΔE <sub>p</sub> )/V<br> I <sub>pa</sub> /I <sub>pc</sub> |
|-------------------------------------------|----------------------------------------------------------------------------|----------------------------------------------------------------------------|----------------------------------------------------------------------------|----------------------------------------------------------------------------|
| <b>1</b>                                  | 869<br> 0.72                                                               | -1675<br> 1.16                                                             | -1987<br> 1.32                                                             |                                                                            |
| <b>2</b>                                  | 879<br> 0.60                                                               | -1383<br> 1.73                                                             | -1563<br> 0.82                                                             | -1941                                                                      |
| <b>3</b>                                  | 346<br> 0.70                                                               | -1919<br> 2.74                                                             | -2370                                                                      |                                                                            |
| <b>4</b>                                  | 479<br> 0.79                                                               | -1058<br> 1.44                                                             | -1704<br> 2.71                                                             | -1958                                                                      |

**Figure S10.** Isothermal compression data of complexes **1-4 (a-d)**

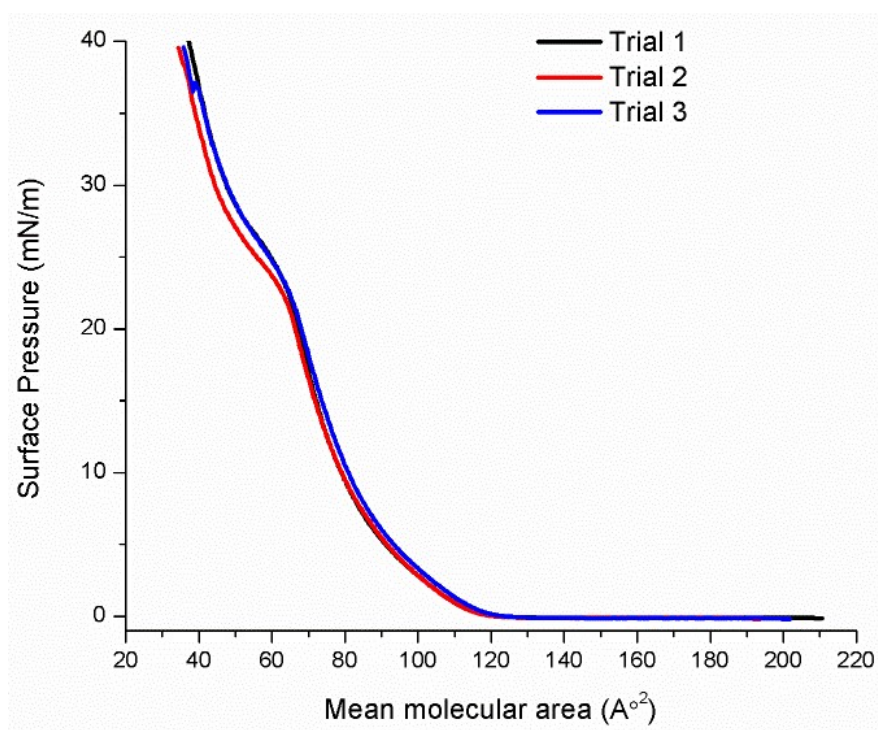

(a) Complex **1**

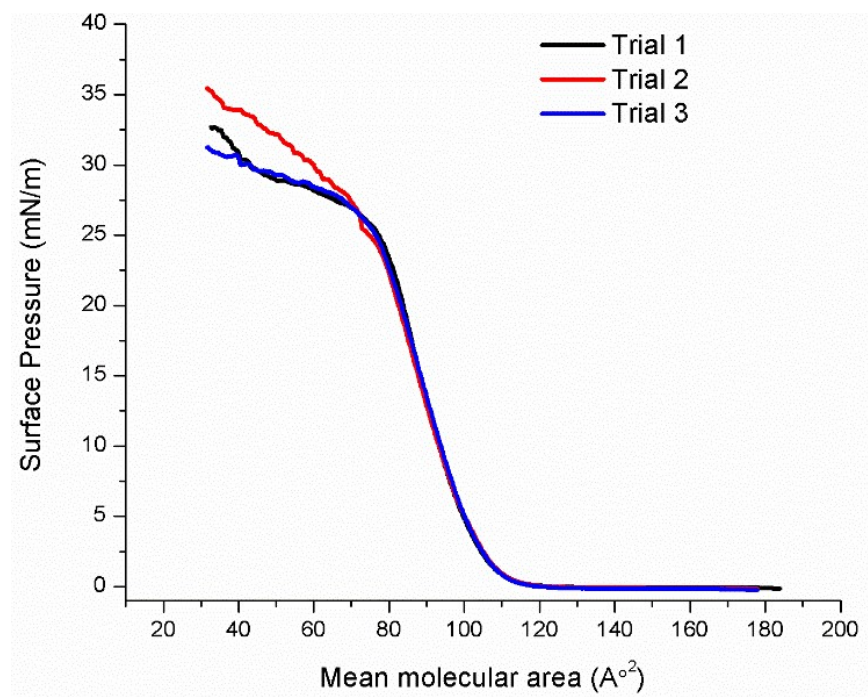

(b) Complex 2

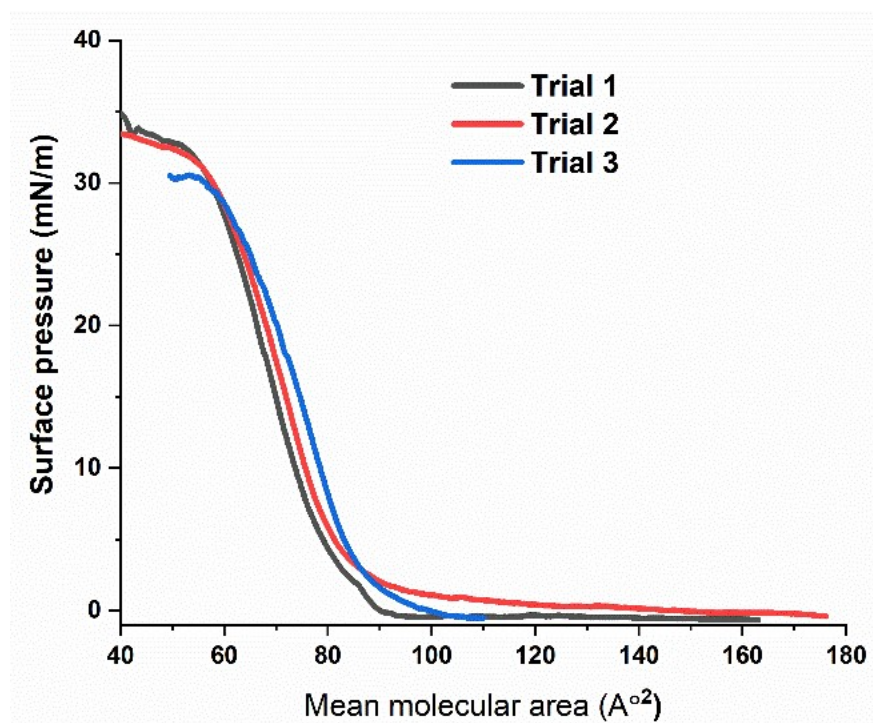

(c) Complex 3

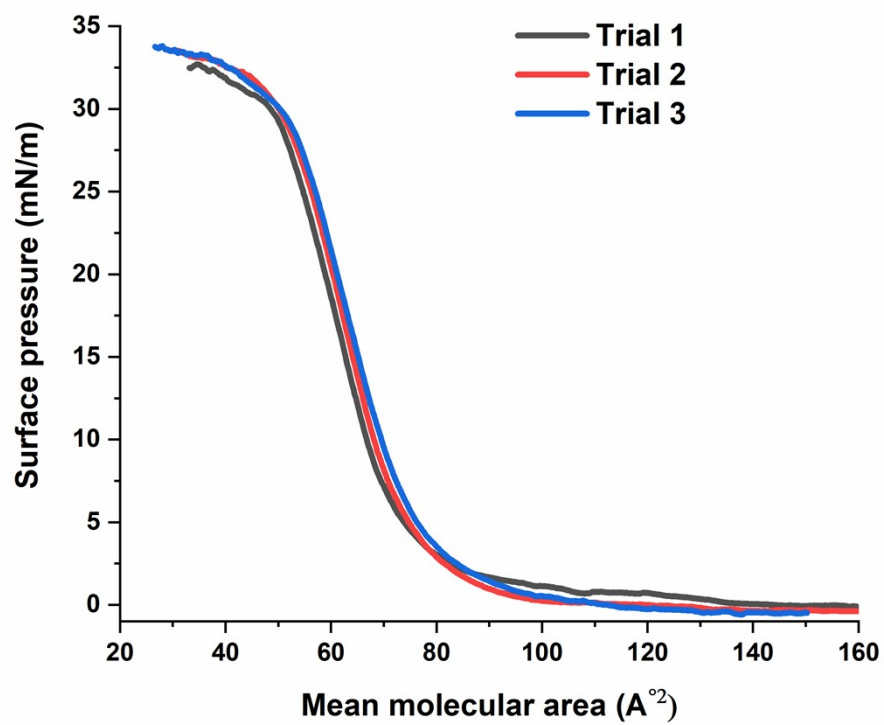

(d) Complex 4

**Figure S11:** BAM Images of Complexes 1, 2 and 3

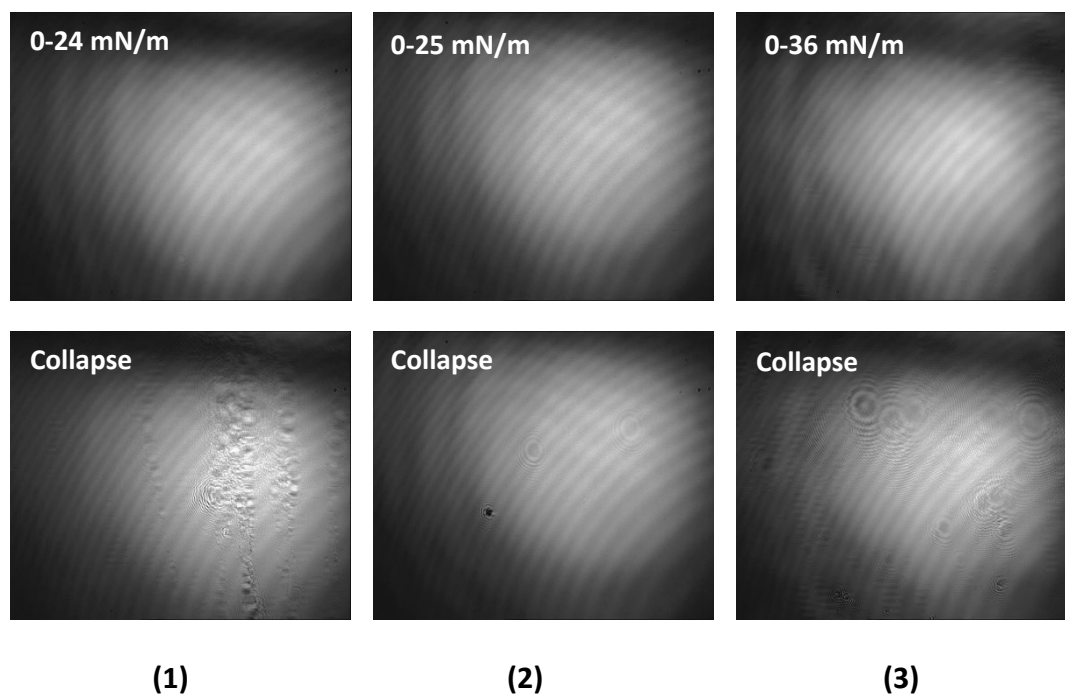

**Table T3.** Transfer ratios of monolayers of complexes **1-4**

| Complex  | Transfer ratio 1 | Transfer ratio 2 | Transfer ratio 3 |
|----------|------------------|------------------|------------------|
| <b>1</b> | 1.746            | 1.777            | 1.929            |
| <b>2</b> | 0.607            | 0.678            | 0.767            |
| <b>3</b> | 1.066            | 1.076            | 1.072            |
| <b>4</b> | 1.049            | 1.035            | 1.031            |

**Figure S12.** Comparison of UV-vis spectrum of LB films and solution state UV-vis spectrum of **3**

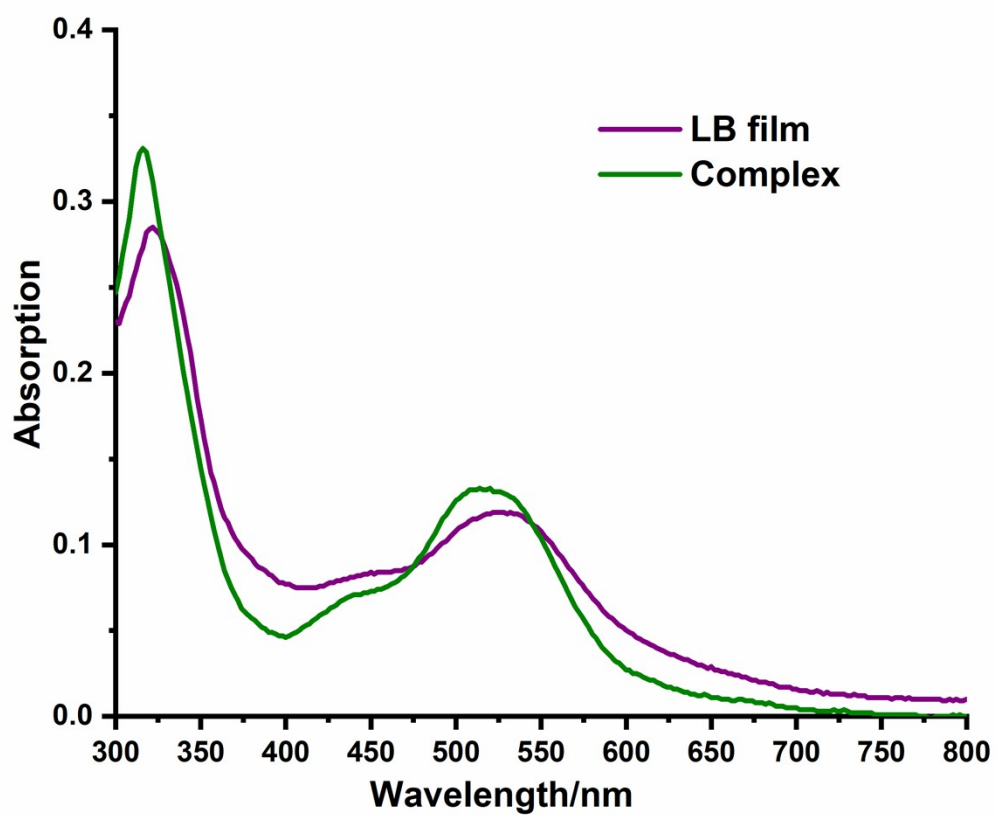

**Figure S13:** Comparison of UV-vis spectrum of LB films and solution state UV-vis spectrum of **4**

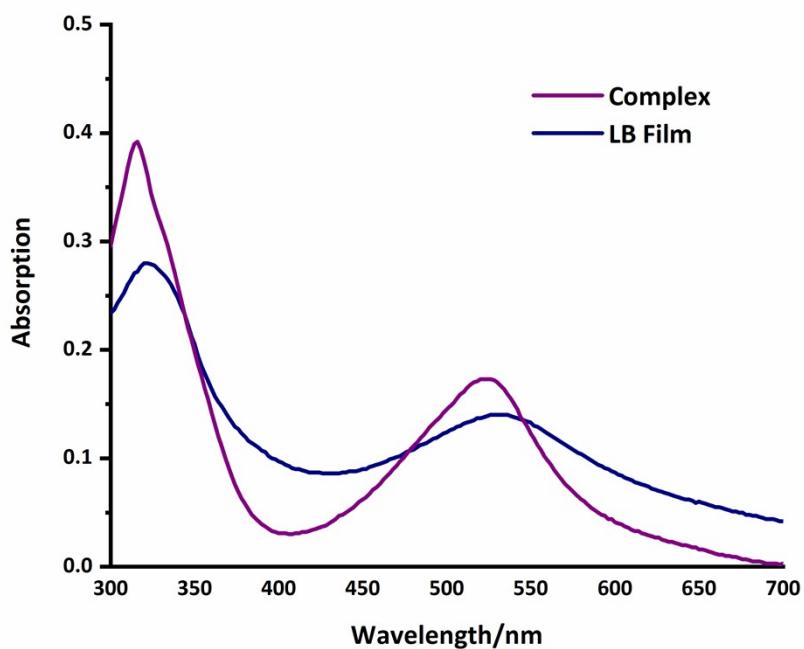

**Figure S14:** Comparison between IR spectrum of complex **4** in KBr and IRRAS spectrum of 47-layer LB film.

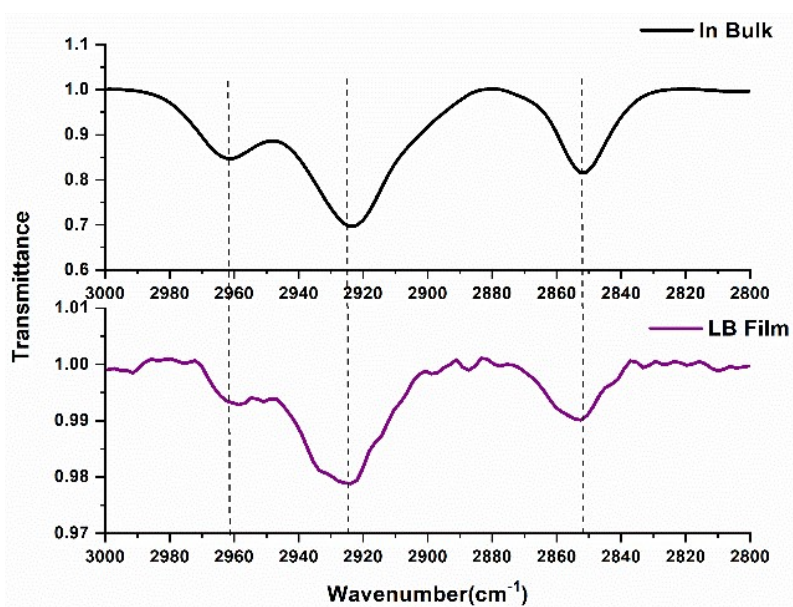

**Figure S15:** Comparison between IR spectrum of complex **3** in KBr and IRRAS spectrum of 47-layer LB film.

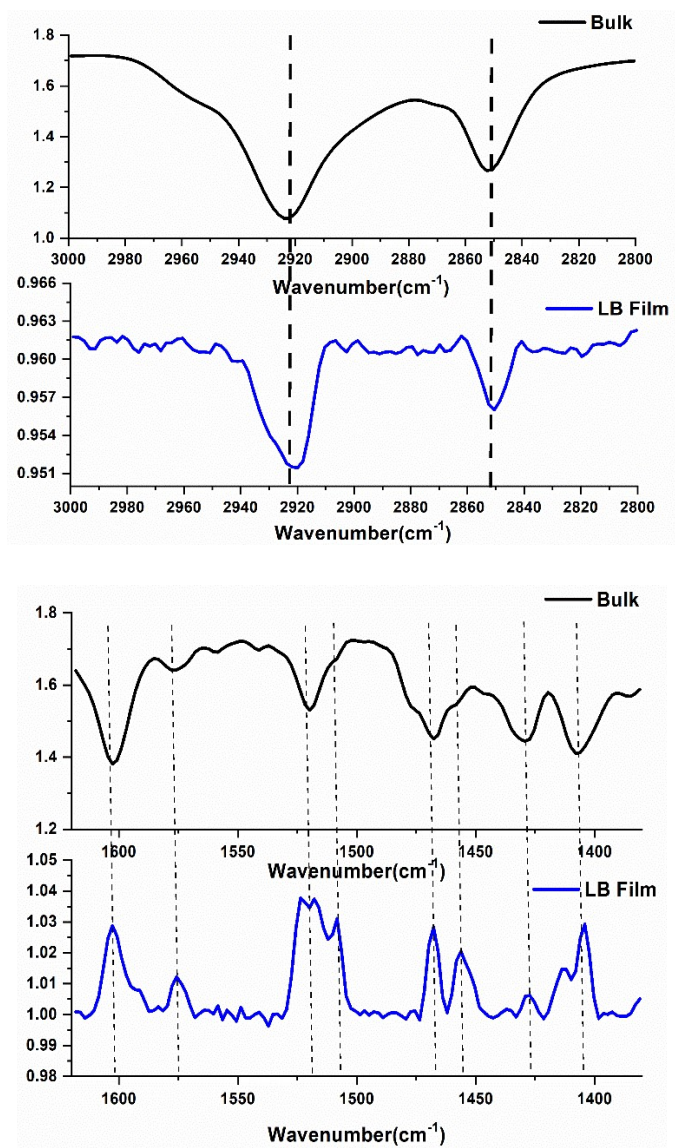

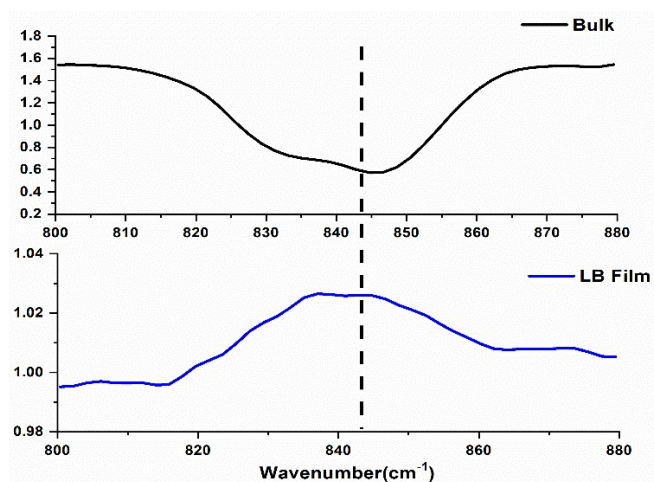

**Figure S16:** Mass spectrum of [Ru(tpy<sup>OC18</sup>)(phen)Cl](PF<sub>6</sub>) **3** recovered from LB films

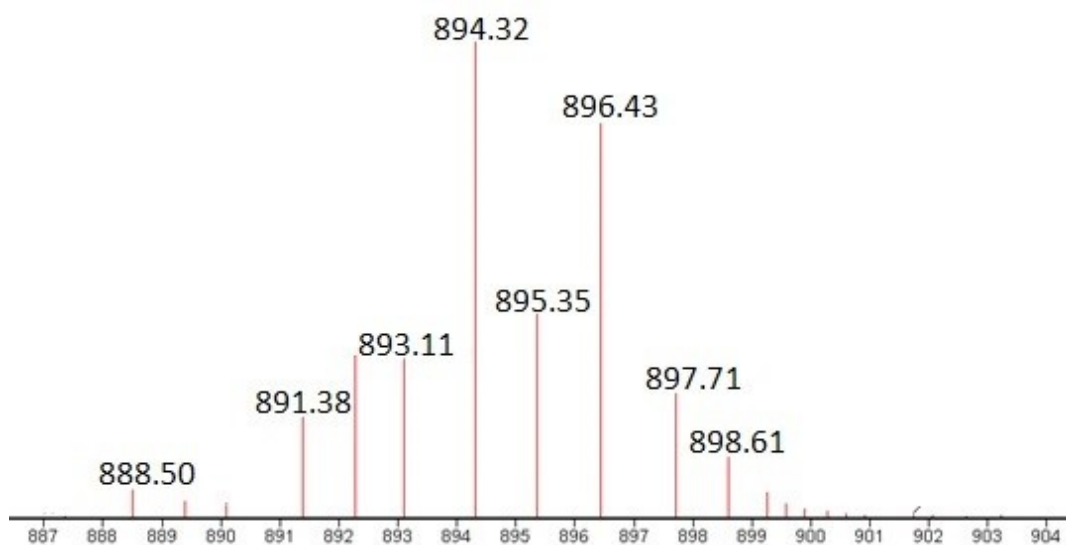

**Figure S17:** Mass spectrum of  $[\text{Ru}(\text{tpy}^{\text{OC18}})(\text{phen}^{\text{NO2}})\text{Cl}](\text{PF}_6)$  **4** recovered from LB films

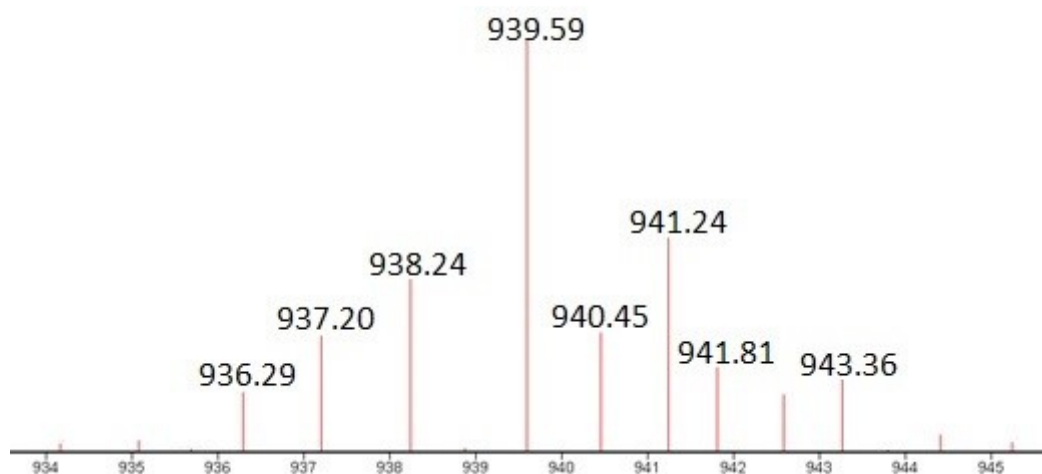

**Figure S18:** AFM images of complex **4** deposited at 18, 23 27, and 30 mN/m

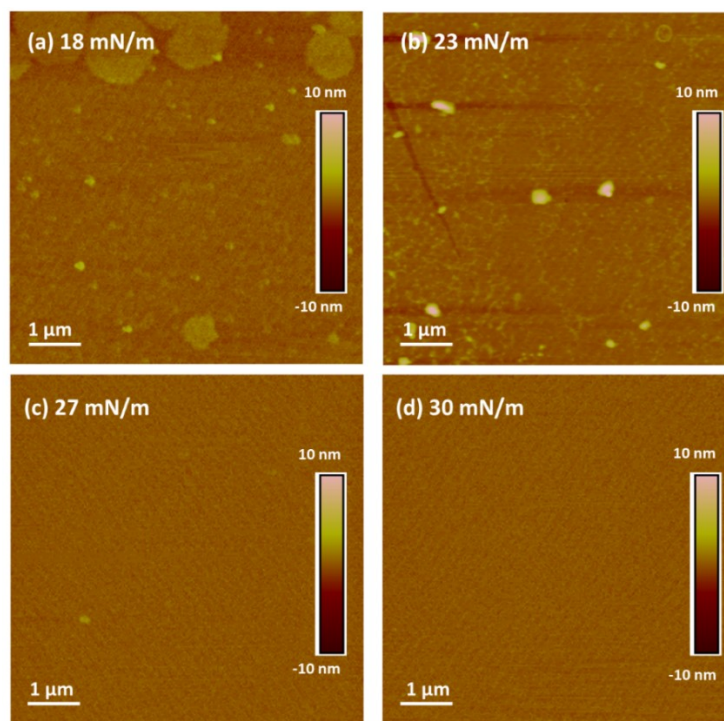

**Table T4:** Summary of surface roughness data of LB monolayers of complex **3** and **4** deposited at

| Complex 3     |              | Complex 4     |              |
|---------------|--------------|---------------|--------------|
| Pressure/mN/m | Roughness/nm | Pressure/mN/m | Roughness/nm |
| 18            | 0.36 ± 0.1   | 17            | 0.22± 0.2    |
| 23            | 0.35 ± 0.5   | 20            | 0.12± 0.1    |
| 27            | 0.26 ± 0.5   | 24            | 0.31± 0.5    |
| 30            | 0.26 ± 0.1   | 28            | 0.32± 0.5    |

different pressures.

**Figure S19:** Asymmetric ruthenium(II) complexes investigated in the theoretical section (the -C<sub>18</sub>H<sub>37</sub> group was replaced by a -CH<sub>3</sub> group)

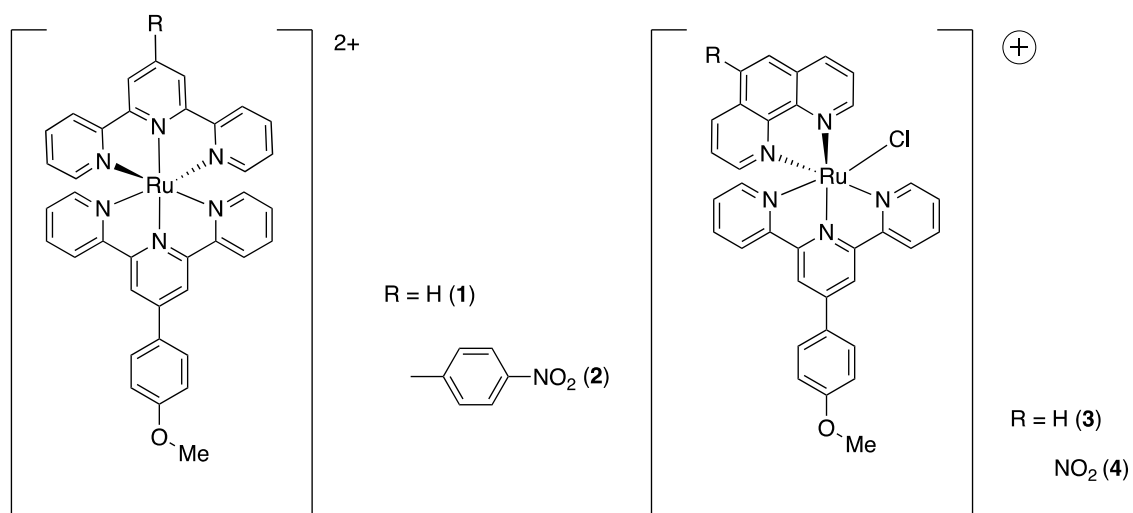

**Figure S20:** (a) Fragment orbital analysis of the singlet state of **1-3** (a-c) in dichloromethane

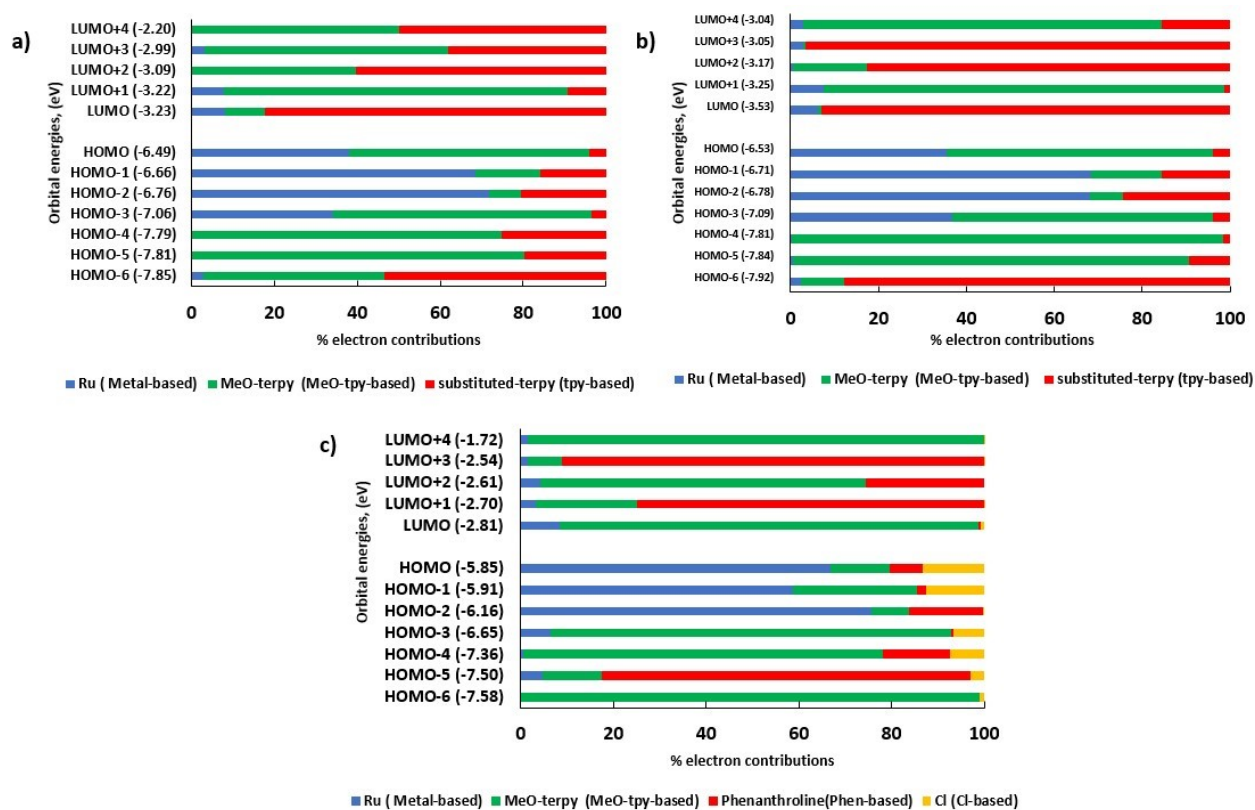

**Figure S21:** Ground state (singlet) frontier molecular orbitals of **1-3** complexes

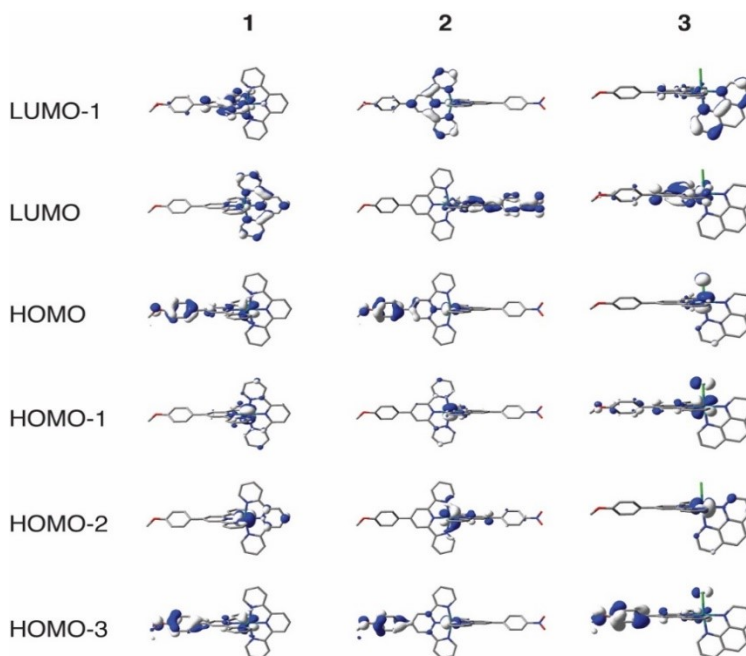

**Figure S22:** Molecular orbital diagram of asymmetric Ru complexes in their singlet ground state. MO colors correspond to their character; blue - metal-based, green - MeO-terpyridine-based,

purple - mixed character with contributions from Ru metal and MeO-terpyridine, brown - substituted terpyridine based, black – mixed character with contributions from MeO-terpyridine and substituted terpyridine, red - phenanthroline based)

The fragment schemes of the complexes:

**1 and 2:** Fragment 1: Ru  
 Fragment 2: MeO-terpyridine  
 Fragment 3: substituted terpyridine

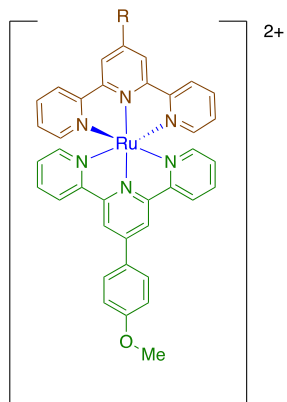

**3 and 4:** Fragment 1: Ru  
 Fragment 2: MeO-terpyridine  
 Fragment 3: substituted phenanthroline  
 Fragment 4: Cl

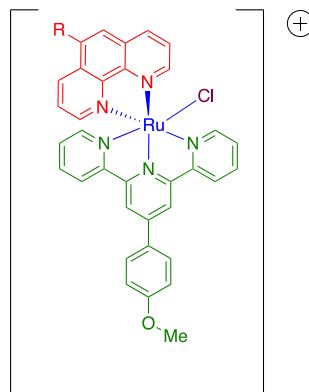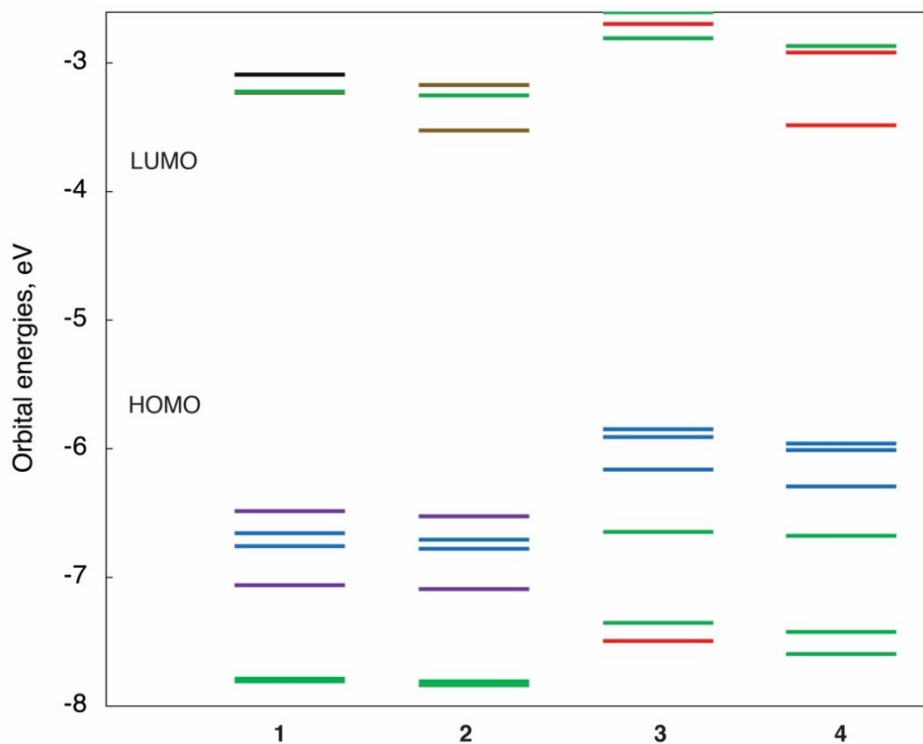

**Figure S23:** Natural orbitals (for open shell species) and molecular orbitals (for closed shell species) of the oxidized and reduced species of an asymmetric Ru complex **1** in dichloromethane. Orbital occupancy is shown for each orbital (0.0 – unoccupied orbital, 1.0 – singly-occupied orbital, 2.0 – doubly-occupied orbital).

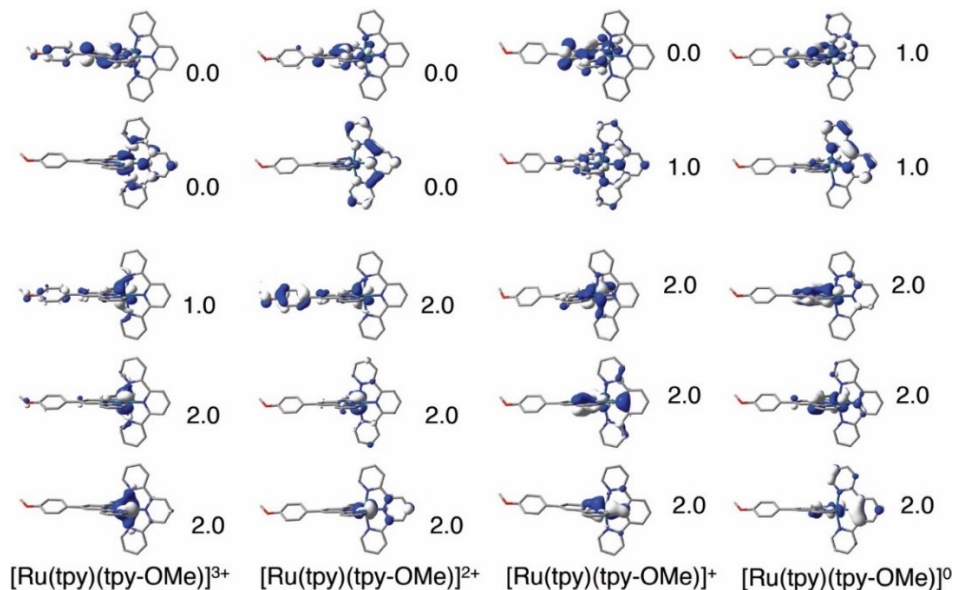

**Figure S24:** Natural orbitals (for open shell species) and molecular orbitals (for closed shell species) of the oxidized and reduced species of an asymmetric Ru complex **2** in dichloromethane. Orbital occupancy is shown for each orbital (0.0 – unoccupied orbital, 1.0 – singly-occupied orbital, 2.0 – doubly-occupied orbital).

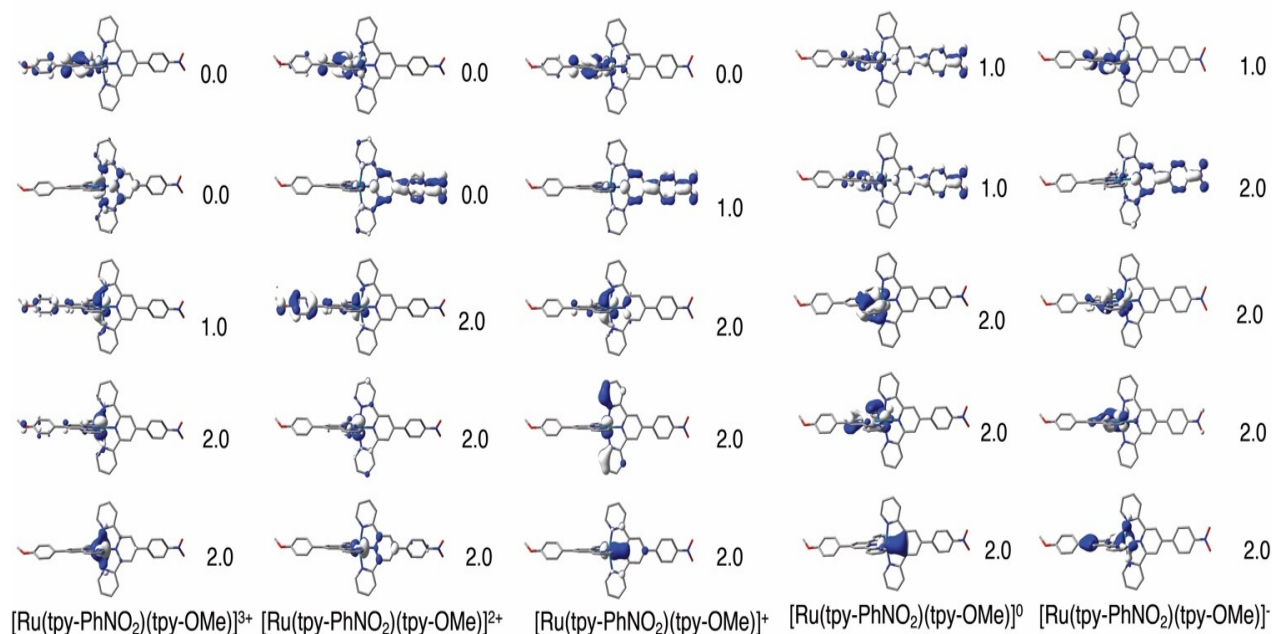

**Figure S25:** Natural orbitals (for open shell species) and molecular orbitals (for closed shell species) of the oxidized and reduced species of an asymmetric Ru complex **3** in dichloromethane. Orbital occupancy is shown for each orbital (0.0 – unoccupied orbital, 1.0 – singly-occupied orbital, 2.0 – doubly-occupied orbital).

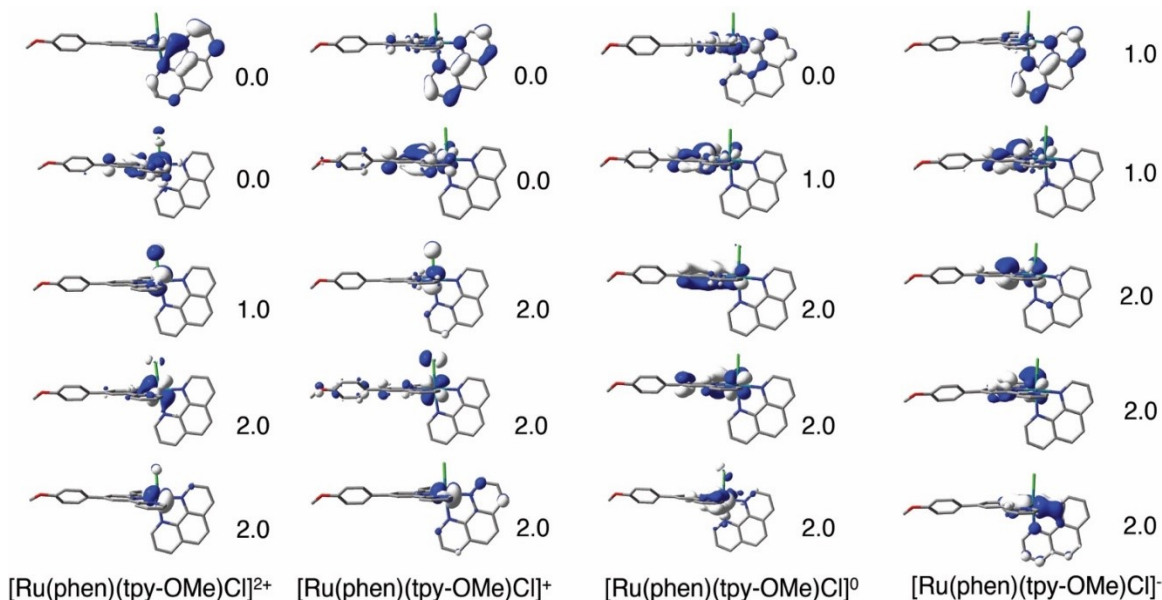

**Figure S26:** Natural orbitals (for open shell species) and molecular orbitals (for closed shell species) of the oxidized and reduced species of an asymmetric Ru complex **4** in dichloromethane. Orbital occupancy is shown for each orbital (0.0 – unoccupied orbital, 1.0 – singly-occupied orbital, 2.0 – doubly-occupied orbital).

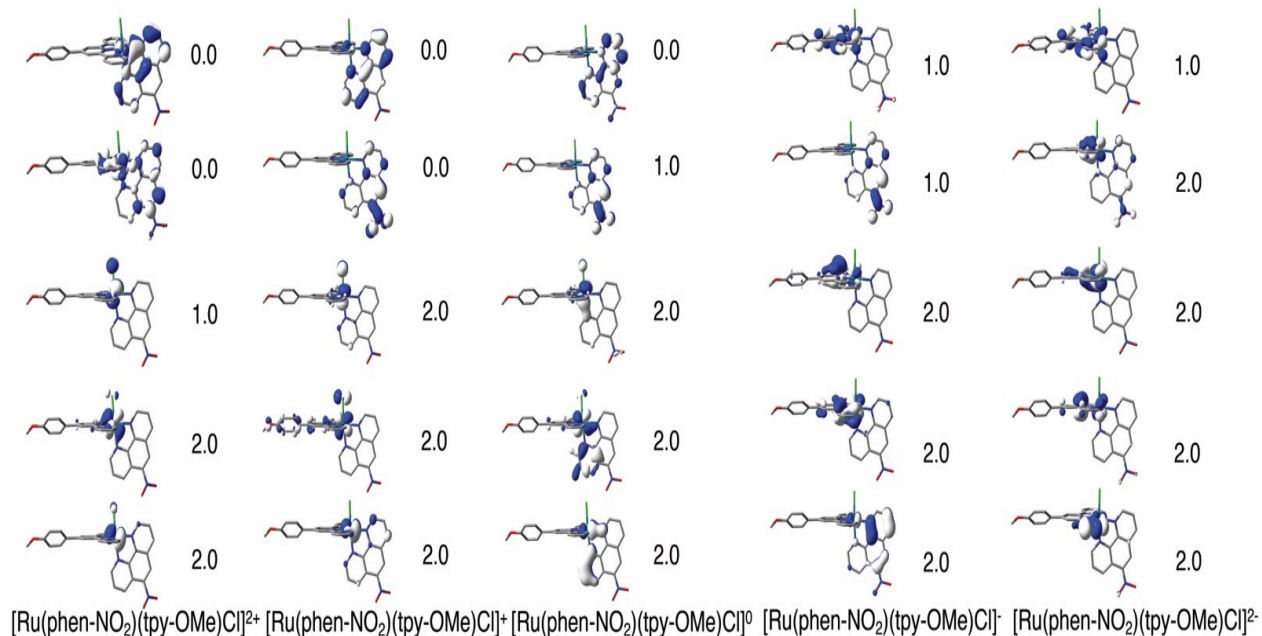

**Table T5:** Electrochemical data for asymmetric Ru(II) complexes in dichloromethane (PCM solvent model), S = singlet, D = doublet and T = triplet

| Redox reaction                                                                                                                                                            | $E_{1/2}$<br>(Calc.) | $E_{1/2}$<br>(Exp) | Assignment                                    |
|---------------------------------------------------------------------------------------------------------------------------------------------------------------------------|----------------------|--------------------|-----------------------------------------------|
| $[\text{Ru}(\text{tpy})(\text{tpy-OMe})]^{3+} (\text{D}) \rightarrow [\text{Ru}(\text{tpy})(\text{tpy-OMe})]^{2+} (\text{S})$                                             | 1.28                 | 0.87               | Ru(II/III)                                    |
| $[\text{Ru}(\text{tpy})(\text{tpy-OMe})]^{2+} (\text{S}) \rightarrow [\text{Ru}(\text{tpy})(\text{tpy-OMe})]^+ (\text{D})$                                                | -1.33                | -1.66              | tpy/tpy <sup>-</sup>                          |
| $[\text{Ru}(\text{tpy})(\text{tpy-OMe})]^+ (\text{D}) \rightarrow [\text{Ru}(\text{tpy})(\text{tpy-OMe})]^0 (\text{T})$                                                   | -2.12                | -1.98              | tpy/tpy <sup>-</sup>                          |
|                                                                                                                                                                           |                      |                    |                                               |
| $[\text{Ru}(\text{NO}_2\text{-tpy})(\text{tpy-OMe})]^{3+} (\text{D}) \rightarrow [\text{Ru}(\text{NO}_2\text{-tpy})(\text{tpy-OMe})]^{2+} (\text{S})$                     | 1.34                 | 0.88               | Ru(II/III)                                    |
| $[\text{Ru}(\text{NO}_2\text{-tpy})(\text{tpy-OMe})]^{2+} (\text{S}) \rightarrow [\text{Ru}(\text{NO}_2\text{-tpy})(\text{tpy-OMe})]^+ (\text{D})$                        | -1.16                | -1.34              | NO <sub>2</sub> /NO <sub>2</sub> <sup>-</sup> |
| $[\text{Ru}(\text{NO}_2\text{-tpy})(\text{tpy-OMe})]^+ (\text{D}) \rightarrow [\text{Ru}(\text{NO}_2\text{-tpy})(\text{tpy-OMe})]^0 (\text{T})$                           | -1.81                | -1.56              | tpy/tpy <sup>-</sup>                          |
| $[\text{Ru}(\text{NO}_2\text{-tpy})(\text{tpy-OMe})]^0 (\text{T}) \rightarrow [\text{Ru}(\text{NO}_2\text{-tpy})(\text{tpy-OMe})]^- (\text{D})$                           | -2.46                | -1.94              | tpy/tpy <sup>-</sup>                          |
|                                                                                                                                                                           |                      |                    |                                               |
| $[\text{Ru}(\text{phen})(\text{tpy-OMe})\text{Cl}]^{2+} (\text{D}) \rightarrow [\text{Ru}(\text{phen})(\text{tpy-OMe})\text{Cl}]^+ (\text{S})$                            | 0.50                 | 0.35               | Ru(II/III)                                    |
| $[\text{Ru}(\text{phen})(\text{tpy-OMe})\text{Cl}]^+ (\text{S}) \rightarrow [\text{Ru}(\text{phen})(\text{tpy-OMe})\text{Cl}]^0 (\text{D})$                               | -1.86                | -1.91              | tpy/tpy <sup>-</sup>                          |
| $[\text{Ru}(\text{phen})(\text{tpy-OMe})\text{Cl}]^0 (\text{D}) \rightarrow [\text{Ru}(\text{phen})(\text{tpy-OMe})\text{Cl}]^- (\text{T})$                               | -2.49                | -2.40              | phen/phen <sup>-</sup>                        |
|                                                                                                                                                                           |                      |                    |                                               |
| $[\text{Ru}(\text{NO}_2\text{-phen})(\text{tpy-OMe})\text{Cl}]^{2+} (\text{D}) \rightarrow [\text{Ru}(\text{NO}_2\text{-phen})(\text{tpy-OMe})\text{Cl}]^+ (\text{S})$    | 0.58                 | 0.48               | Ru(II/III)                                    |
| $[\text{Ru}(\text{NO}_2\text{-phen})(\text{tpy-OMe})\text{Cl}]^+ (\text{S}) \rightarrow [\text{Ru}(\text{NO}_2\text{-phen})(\text{tpy-OMe})\text{Cl}]^0 (\text{D})$       | -1.15                | -1.06              | NO <sub>2</sub> /NO <sub>2</sub> <sup>-</sup> |
| $[\text{Ru}(\text{NO}_2\text{-phen})(\text{tpy-OMe})\text{Cl}]^0 (\text{D}) \rightarrow [\text{Ru}(\text{NO}_2\text{-phen})(\text{tpy-OMe})\text{Cl}]^{1-} (\text{T})$    | -2.15                | -1.71              | tpy/tpy <sup>-</sup>                          |
| $[\text{Ru}(\text{NO}_2\text{-phen})(\text{tpy-OMe})\text{Cl}]^{1-} (\text{T}) \rightarrow [\text{Ru}(\text{NO}_2\text{-phen})(\text{tpy-OMe})\text{Cl}]^{2-} (\text{D})$ | -2.90                | -2.08              | phen/phen <sup>-</sup>                        |

**Figure S27:** I-V characteristics of complex **4** in four devices

Assembly 1

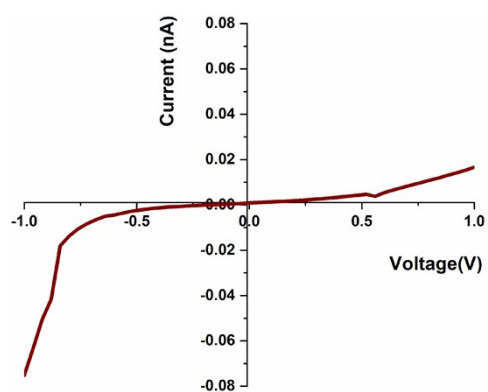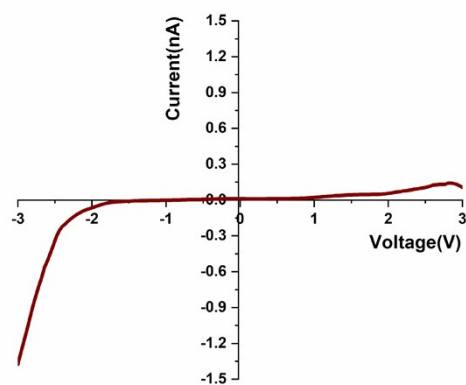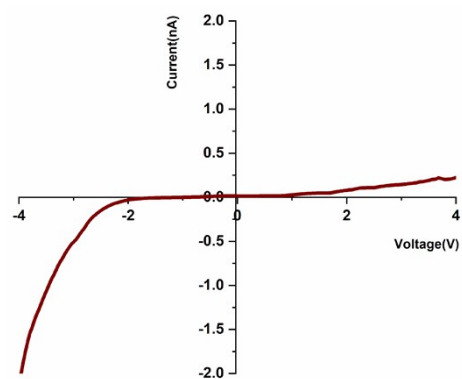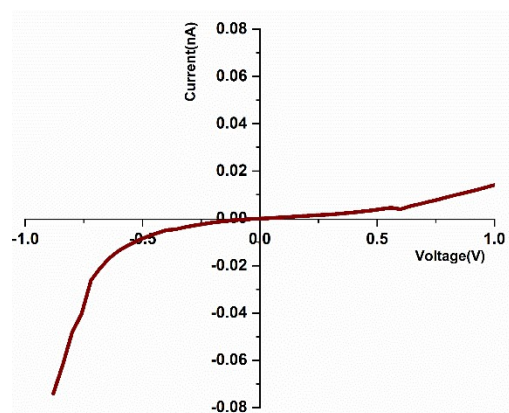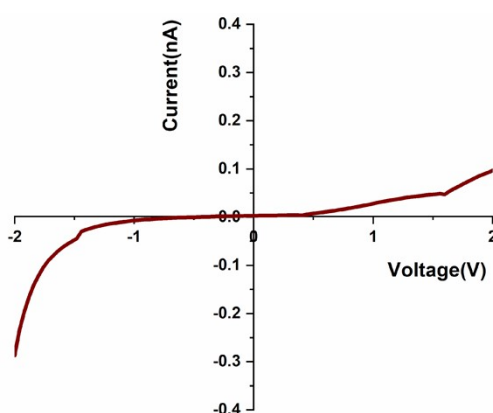

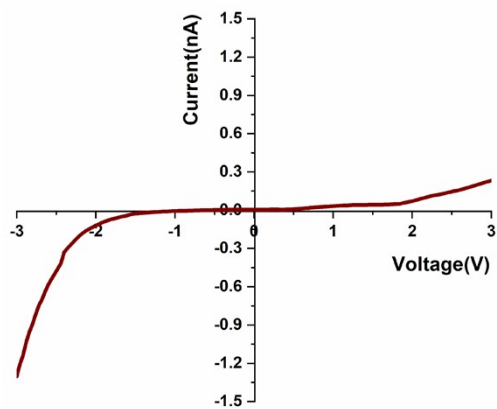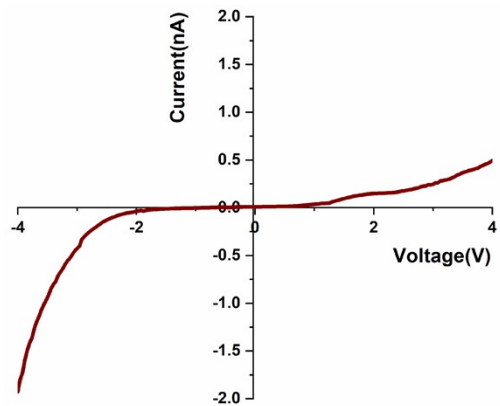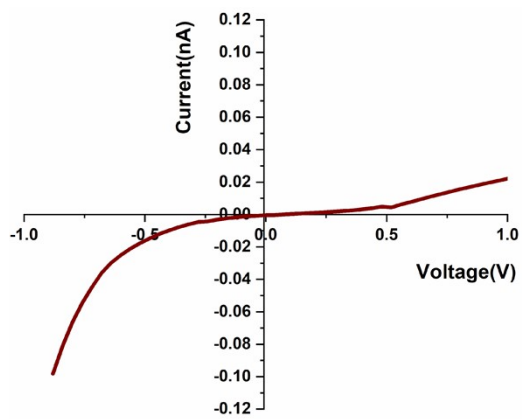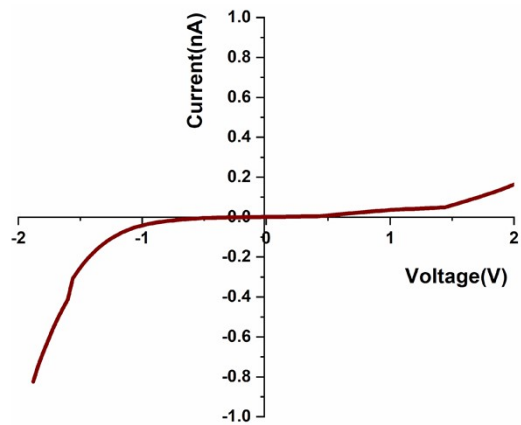

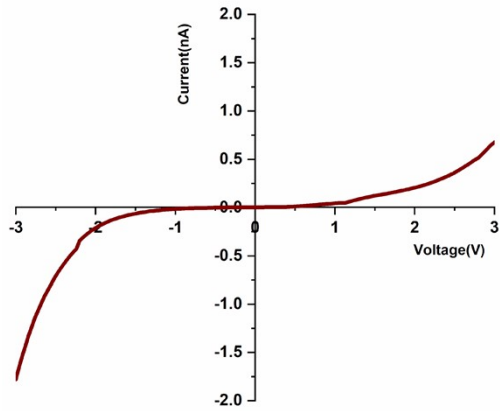

## Assembly 2

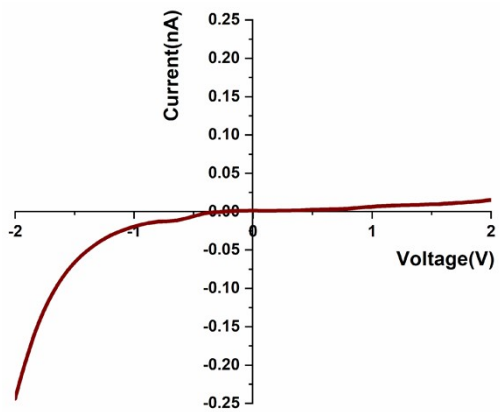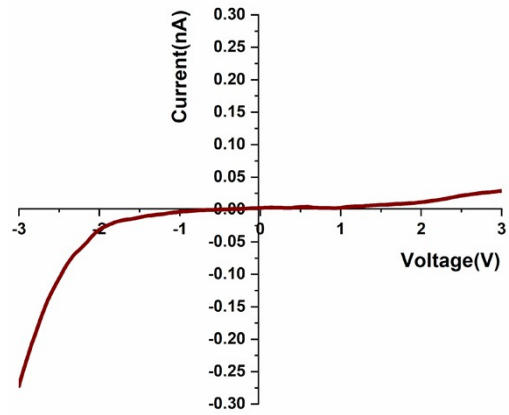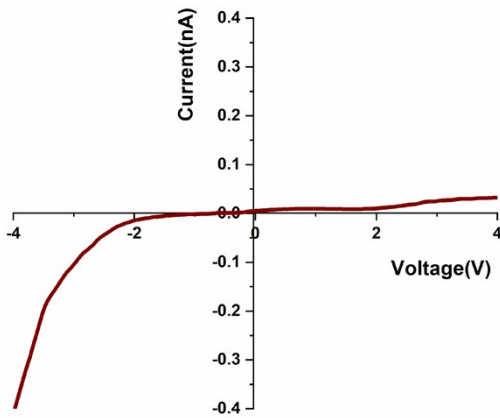

Assembly 3

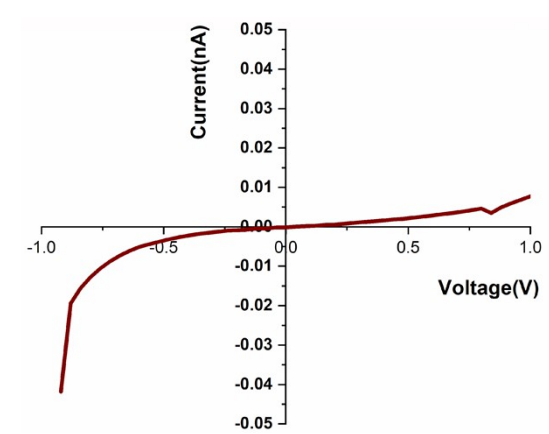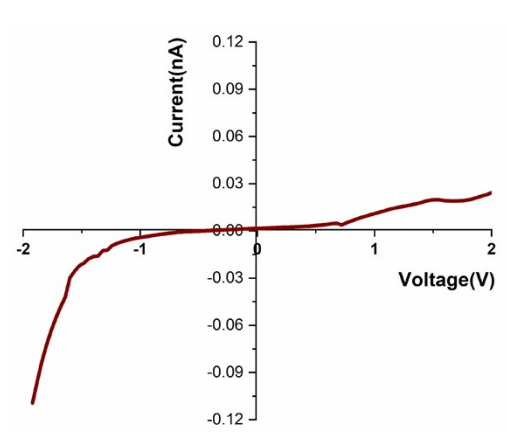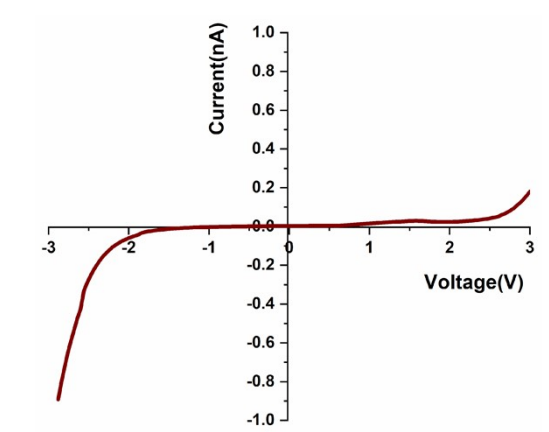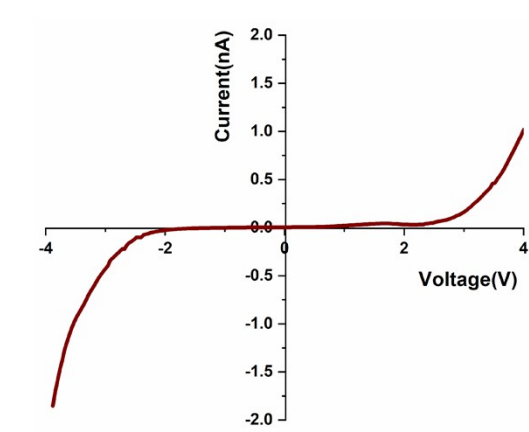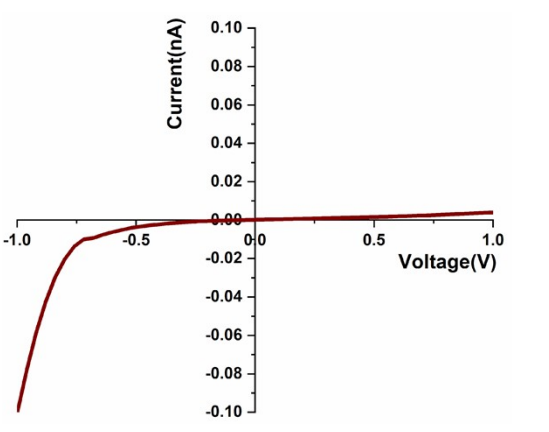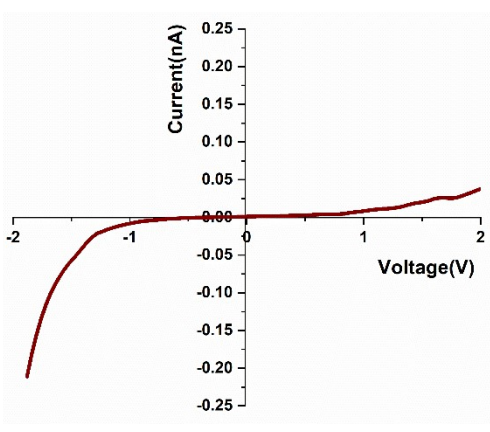

### Assembly 3

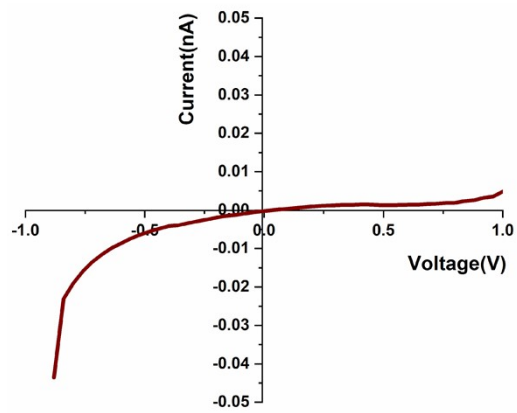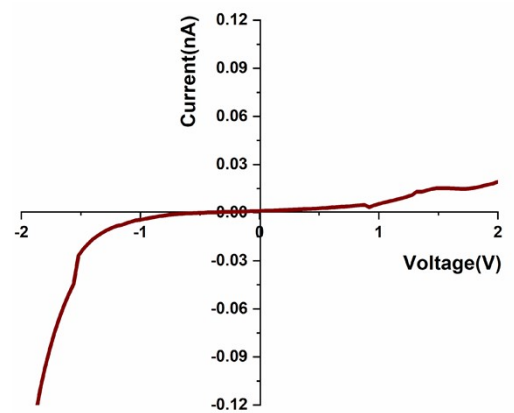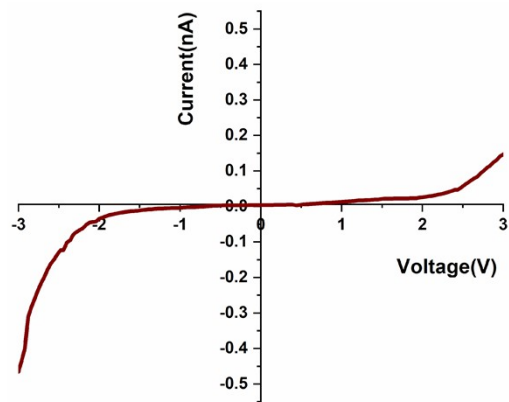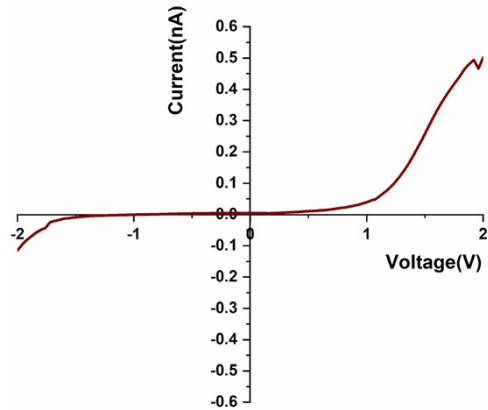

Supplement: d3dt01797d1.pdf [file d3dt01797d1.pdf]
